# Supplementary material for: Assessing the contribution of rare protein-coding germline variants to prostate cancer risk and severity in 37,184 cases
Source: Springer Nature journal article supplement (doi:10.1038/s41467-025-56944-1), 2025-02-19
Supplement: MOESM1 [file 41467_2025_56944_MOESM1_ESM.pdf]

## Supplementary Figures

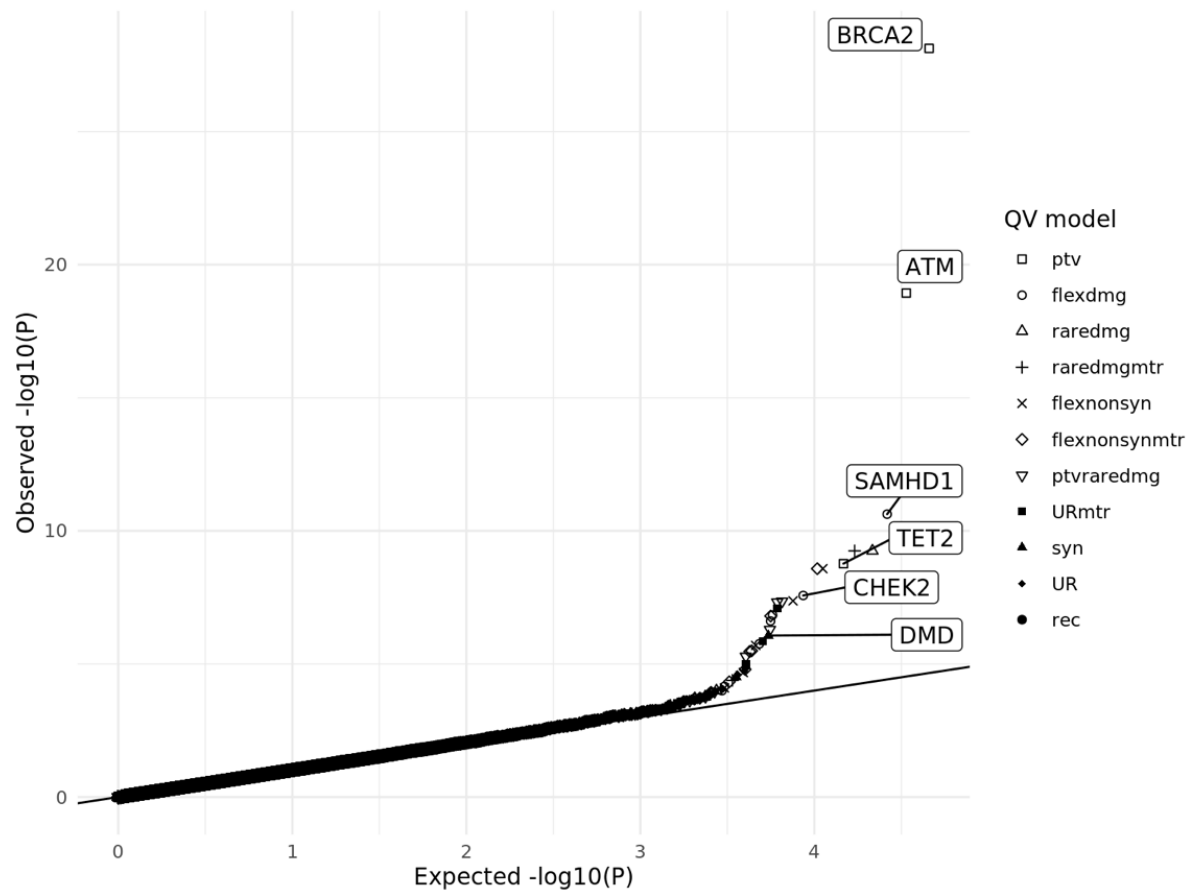

**Supplementary Figure 1: QQ-plot for meta-analysis of gene-level association tests for all qualifying variant (QV) models for risk of developing prostate cancer (cases versus controls).** Expected  $P$ -values on x-axis are generated from  $n-1$  case-control permutation.  $P$ -values were determined from a Cochran–Mantel–Haenszel test across cohorts. Genes which reach the suggestive significance threshold ( $P < 2.6 \times 10^{-6}$ ) are labelled, and only the most significant QV model for each gene is labelled. All QV models defined in Supplementary Data 1.

## BRCA2 (ptv)

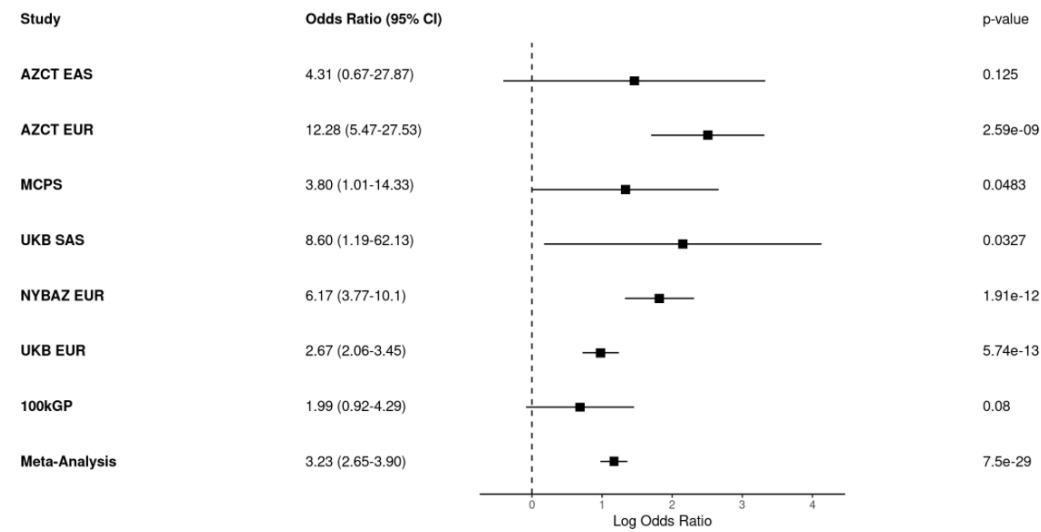

## ATM (ptv)

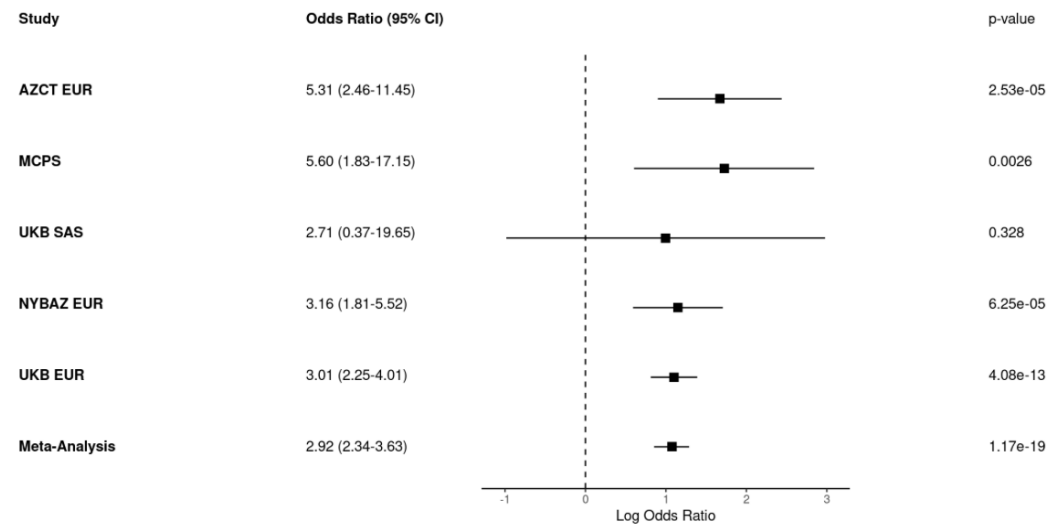

## SAMHD1 (flexdmg)

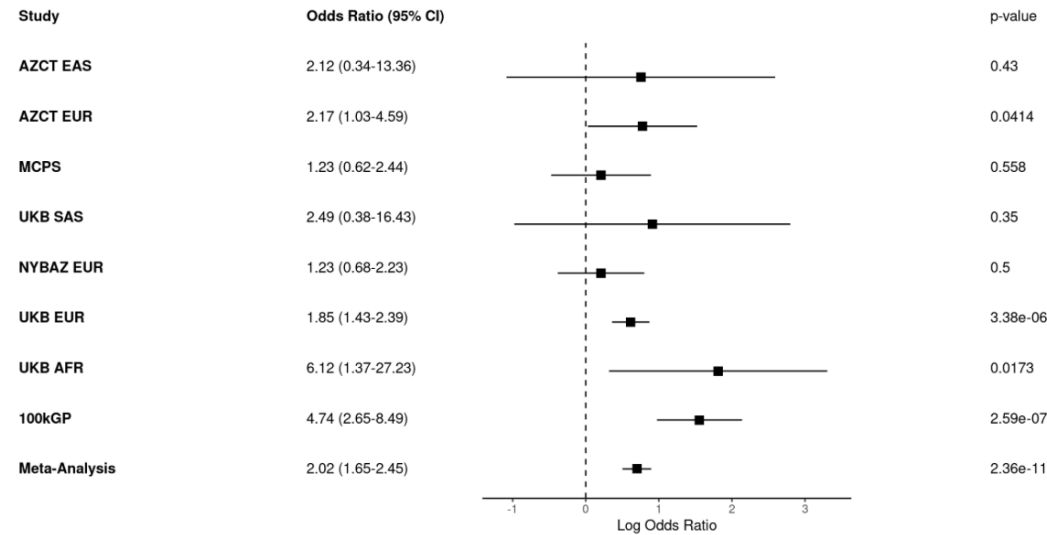

## TET2 (ptv)

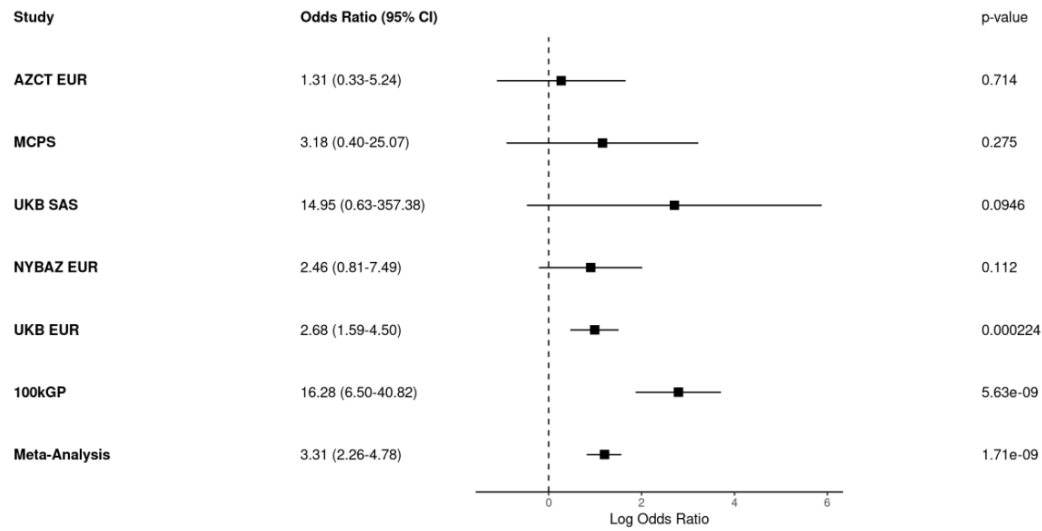

## CHEK2 (flexdmg)

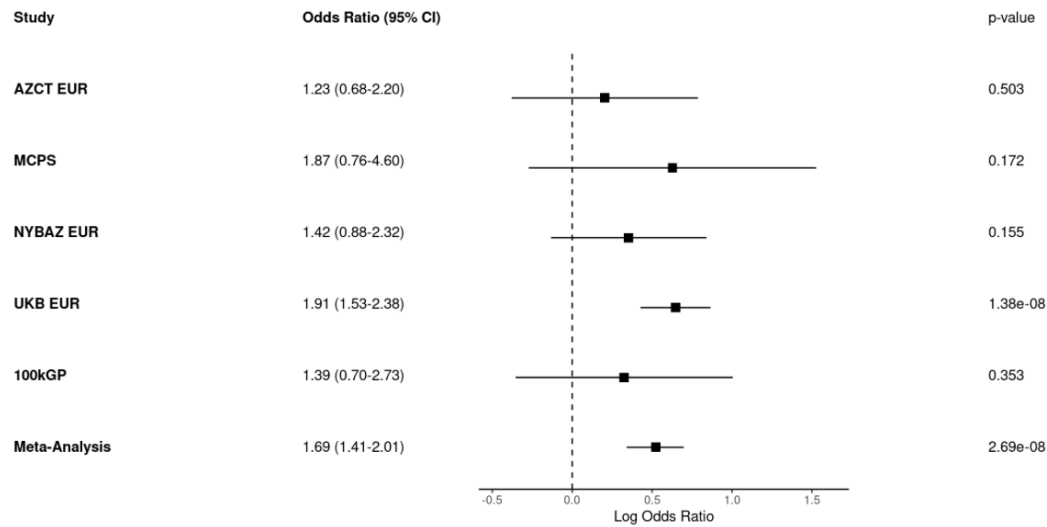

## DMD (syn)

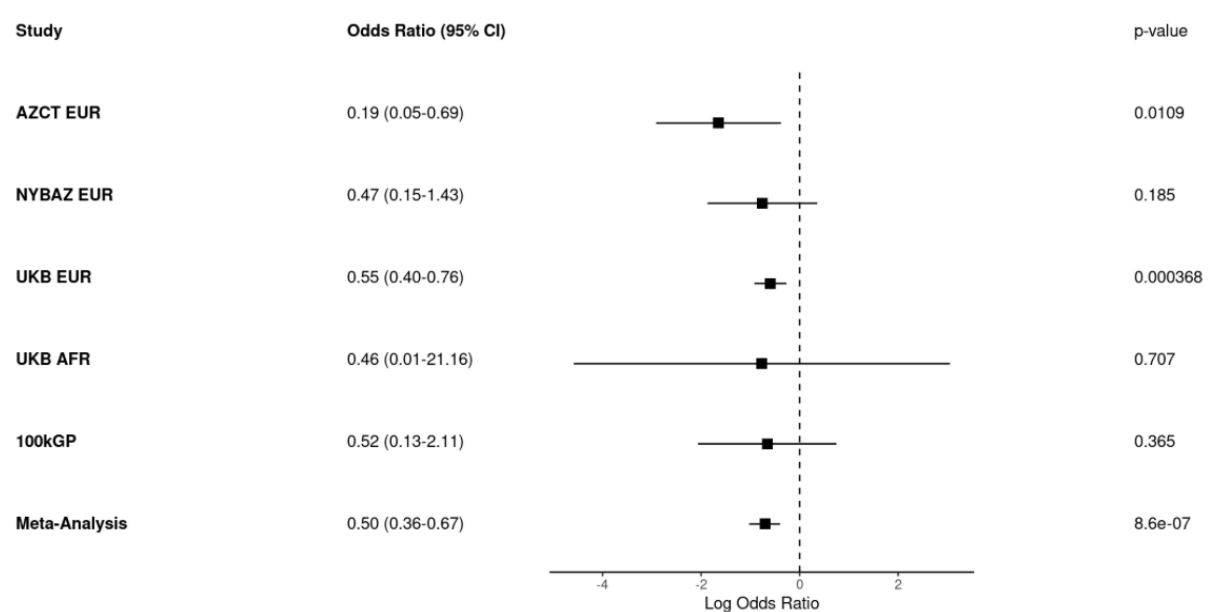

**Supplementary Figure 2: Forest plots showing the within study association statistics for all genes associated with the development of prostate cancer at the suggestive significance threshold ( $P < 2.6 \times 10^{-6}$ ).** Results are from the gene-level collapsing analysis, and only the qualifying variant (QV) model with the lowest  $P$ -value for each gene is displayed (as indicated in parentheses). Meta-analysis odds ratios and  $P$ -values were determined from a Cochran–Mantel–Haenszel test across cohorts, and individual cohort odds ratios and  $P$ -values were calculated with Fisher's exact test (two-sided). Studies with missing data not included: full summary statistics can be found in Supplementary Data 3. All QV models defined in Supplementary Data 1. UKB, UK Biobank; MCPS, Mexico City prospective Study; 100kGP, 100,000 Genomes Project; NYBAZ Study, New York-Boston-AstraZeneca prostate cancer study; AZCT, AstraZeneca Clinical Trials.

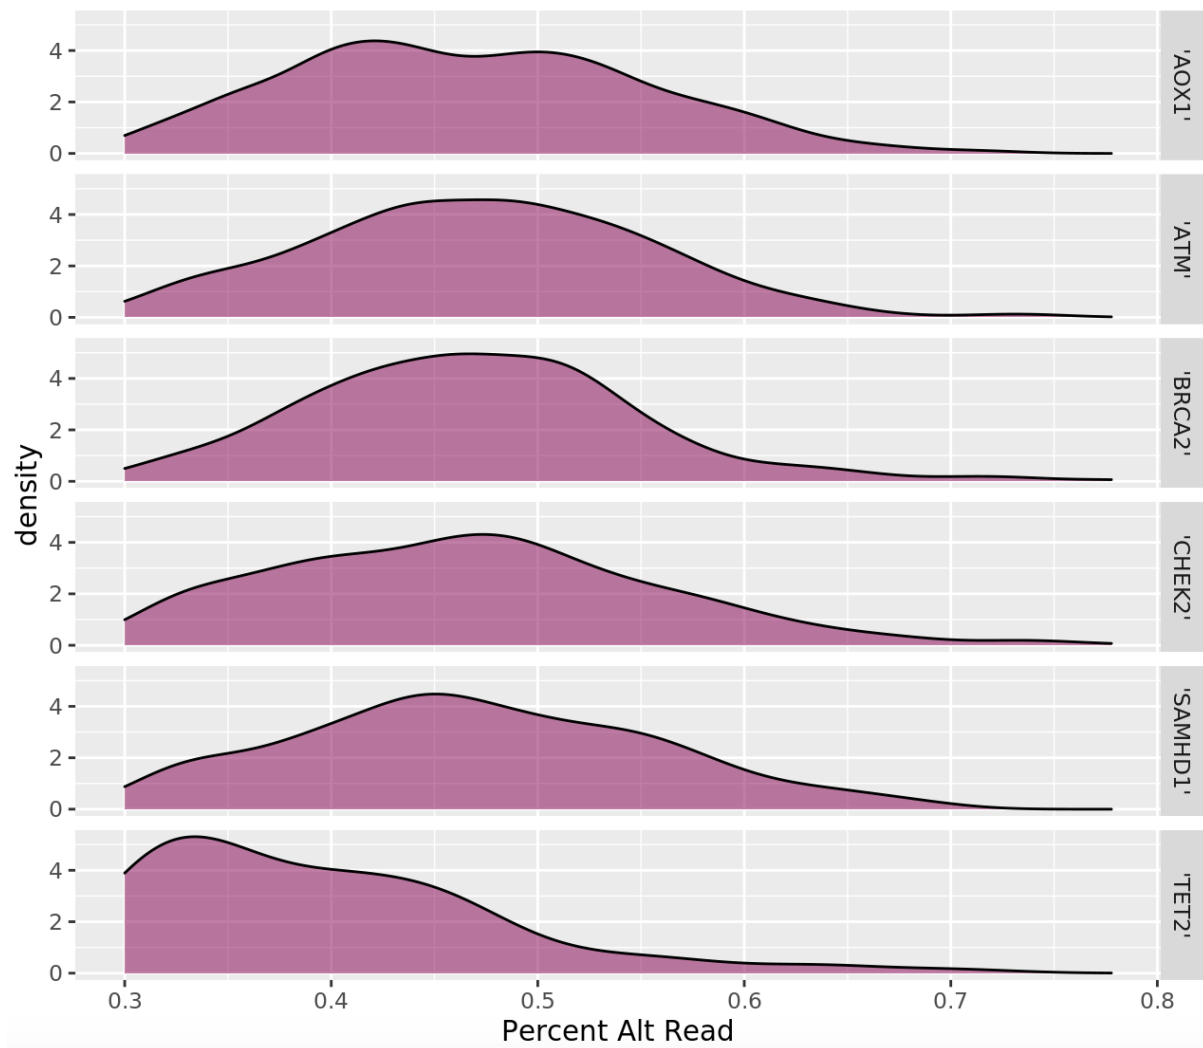

**Supplementary Figure 3: Distribution of alternative (Alt) reads percentage for qualifying variants in genes associated with prostate cancer.**

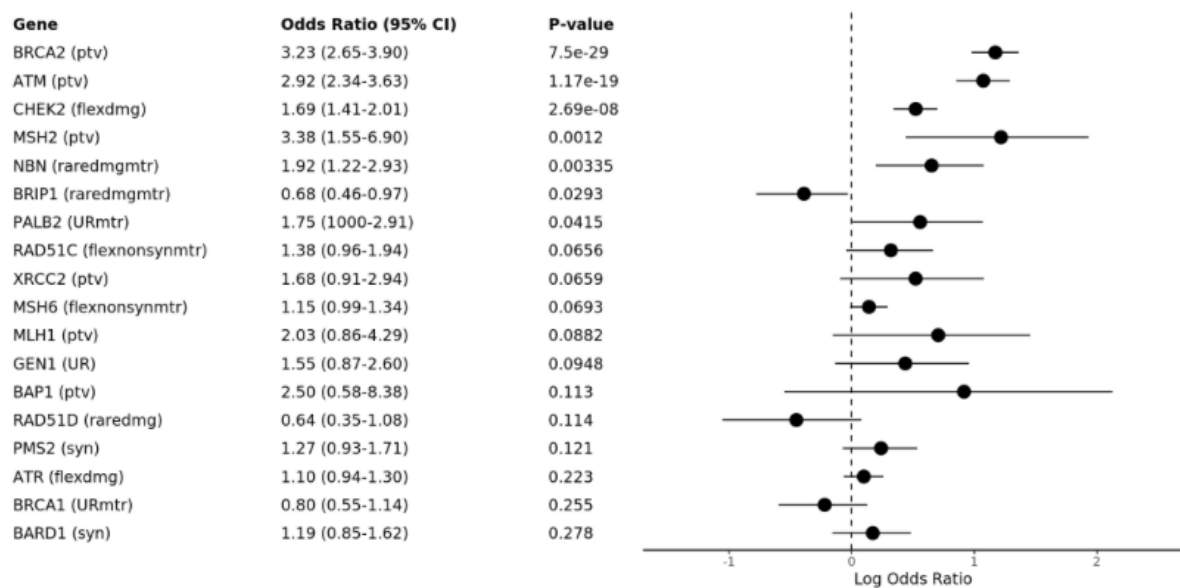

**Supplementary Figure 4: Forest plots showing the meta-analysis association of DNA damage response genes with the development of prostate cancer (cases versus controls).** Results are from the gene-level collapsing analysis, and only the qualifying variant (QV) model with the lowest *P*-value for each gene is displayed (as indicated in column one parentheses). Odds ratio and *P*-values were determined from a Cochran–Mantel–Haenszel test across cohorts. All QV models defined in Supplementary Data 1.

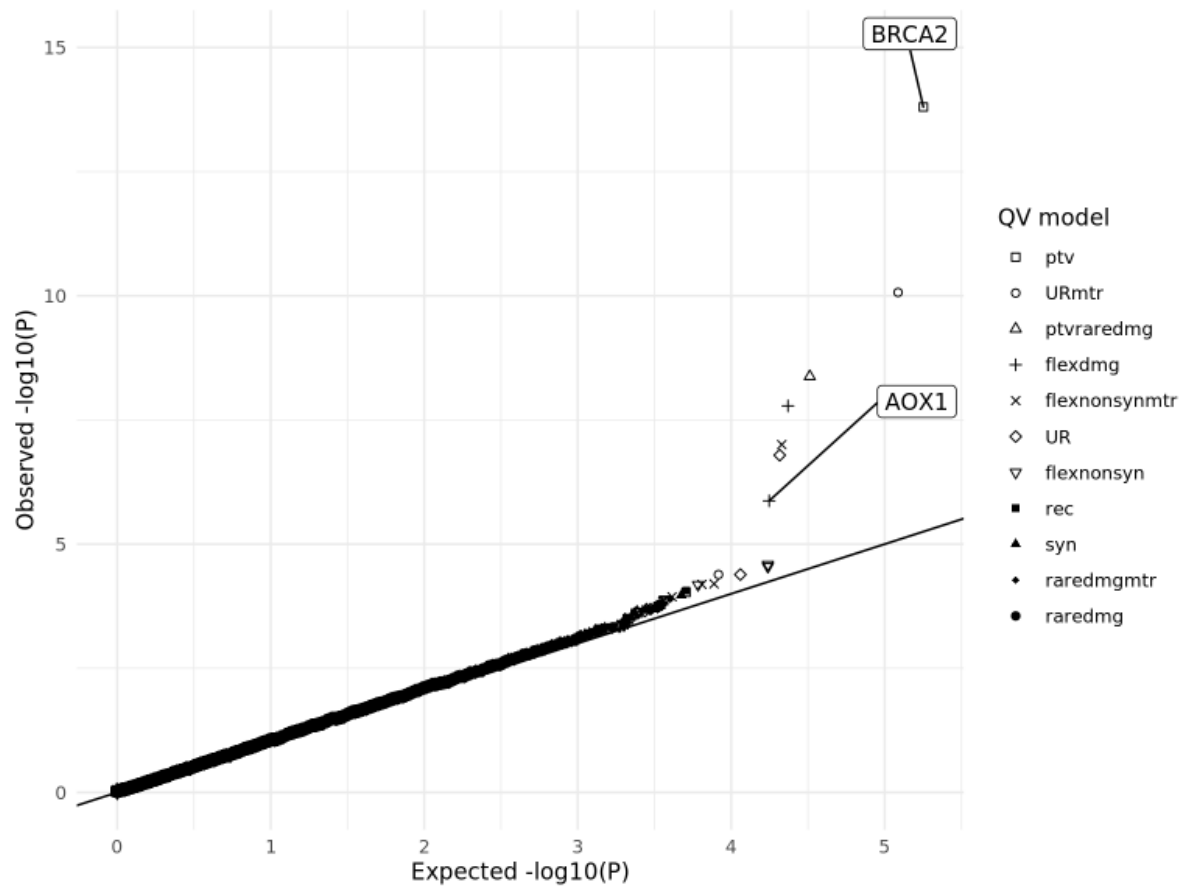

**Supplementary Figure 5: QQ-plot for meta-analysis of gene-level association tests for all qualifying variant (QV) models for prostate cancer severity (aggressive prostate cancer vs non- aggressive prostate cancer).** Expected  $P$ -values on x-axis are generated from  $n-1$  case-control permutation.  $P$ -values were determined from a Cochran–Mantel–Haenszel test across cohorts. Genes which reach the suggestive significance threshold ( $P < 2.6 \times 10^{-6}$ ) are labelled, and only the most significant QV model for each gene is labelled. All QV models defined in Supplementary Data 1.

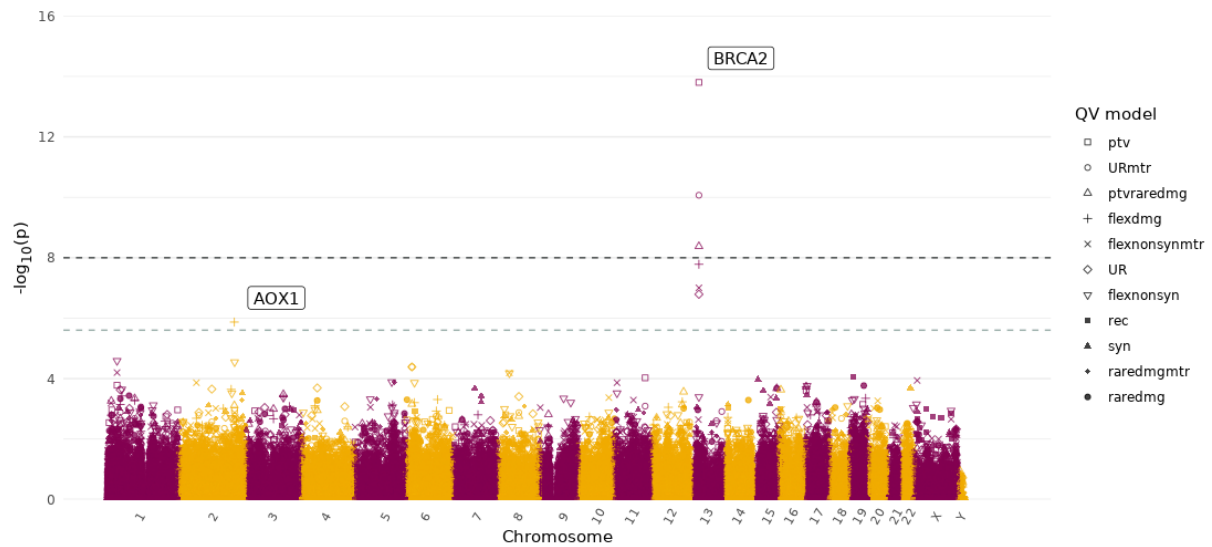

**Supplementary Figure 6: Manhattan plot of all gene-level association tests with aggressive prostate cancer versus non-aggressive prostate cancer.** The x-axis is the genomic position of the gene, and the y-axis is the  $-\log_{10}$  transformed unadjusted  $P$ -values for all qualifying variant (QV) models as indicated in the legend.  $P$ -values were determined from a Cochran–Mantel–Haenszel test across cohorts. The light grey dashed line represents the suggestive significance threshold ( $P = 2.6 \times 10^{-6}$ ) and the dark grey dashed line the study-wide significance threshold ( $P = 1 \times 10^{-8}$ ). Genes which reach the suggestive significance threshold are labelled, and only the most significant QV model for each gene is labelled. All QV models defined in Supplementary Data 1.



## BRCA2 (ptv)

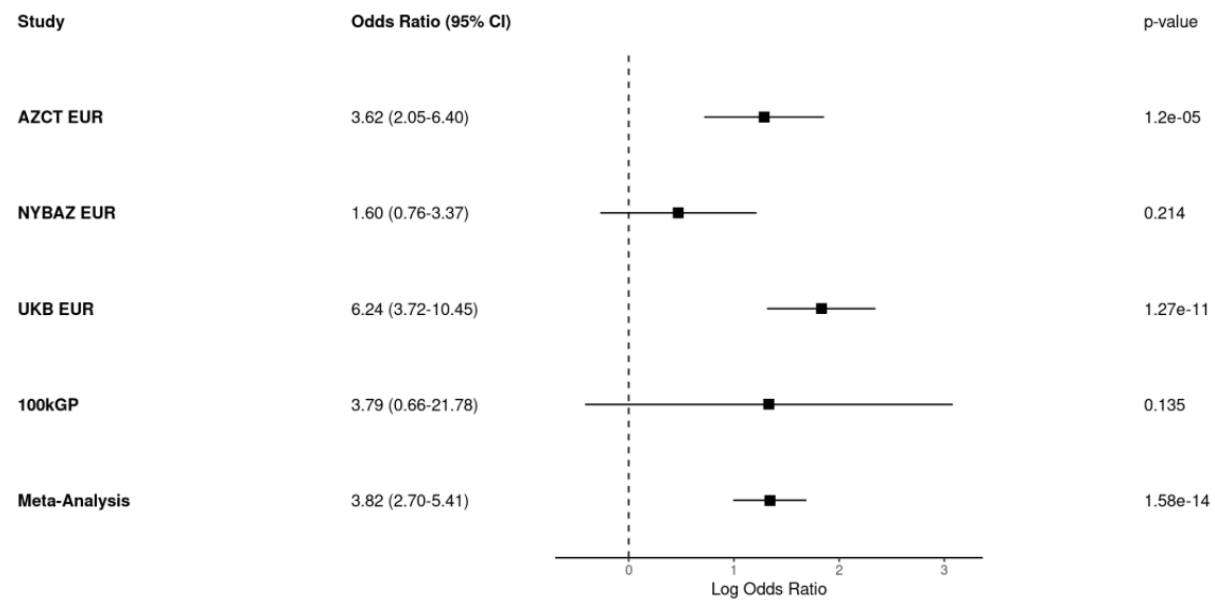

## AOX1 (flexdmg)

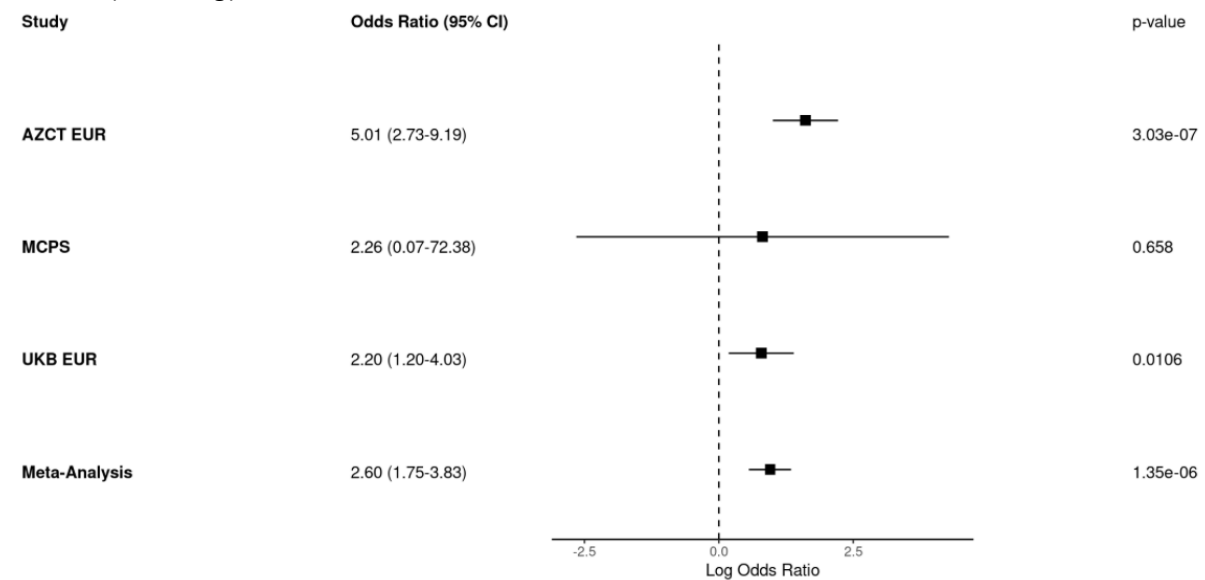

**Supplementary Figure 7: Forest plots showing the within study association statistics for all genes associated with aggressive prostate cancer versus non-aggressive prostate cancer at the suggestive significance threshold ( $P < 2.6 \times 10^{-6}$ ).** Results are from the gene-level collapsing analysis, and only the qualifying variant (QV) model with the lowest  $P$ -value for each gene is displayed (as indicated in parentheses). Meta-analysis odds ratios and  $P$ -values were determined from a Cochran–Mantel–Haenszel test across cohorts, and individual cohort odds ratios and  $P$ -values were calculated with Fisher's exact test (two-sided). Studies with missing data not included: full summary statistics can be found in Supplementary Data 7. All QV models defined in Supplementary Data 1.

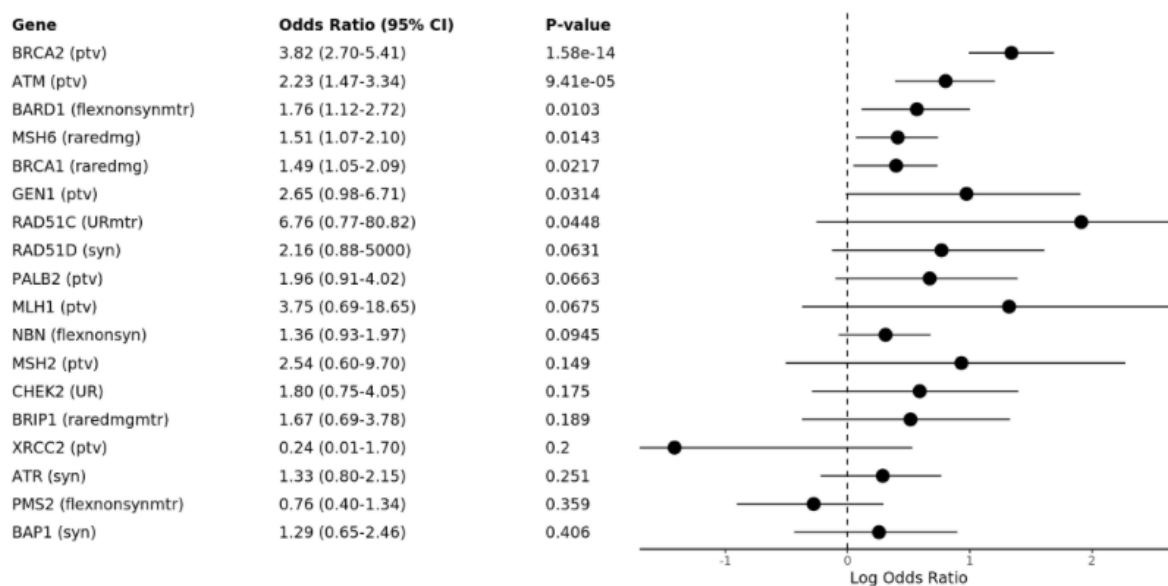

**Supplementary Figure 8: Forest plots showing the meta-analysis association of DNA damage response genes with aggressive prostate cancer versus non-aggressive prostate cancer.** Results are from the gene-level collapsing analysis, and only the qualifying variant (QV) model with the lowest *P*-value for each gene is displayed (as indicated in column one parentheses). Odds ratios and *P*-values were determined from a Cochran–Mantel–Haenszel test across cohorts. All QV models defined in Supplementary Data 1.

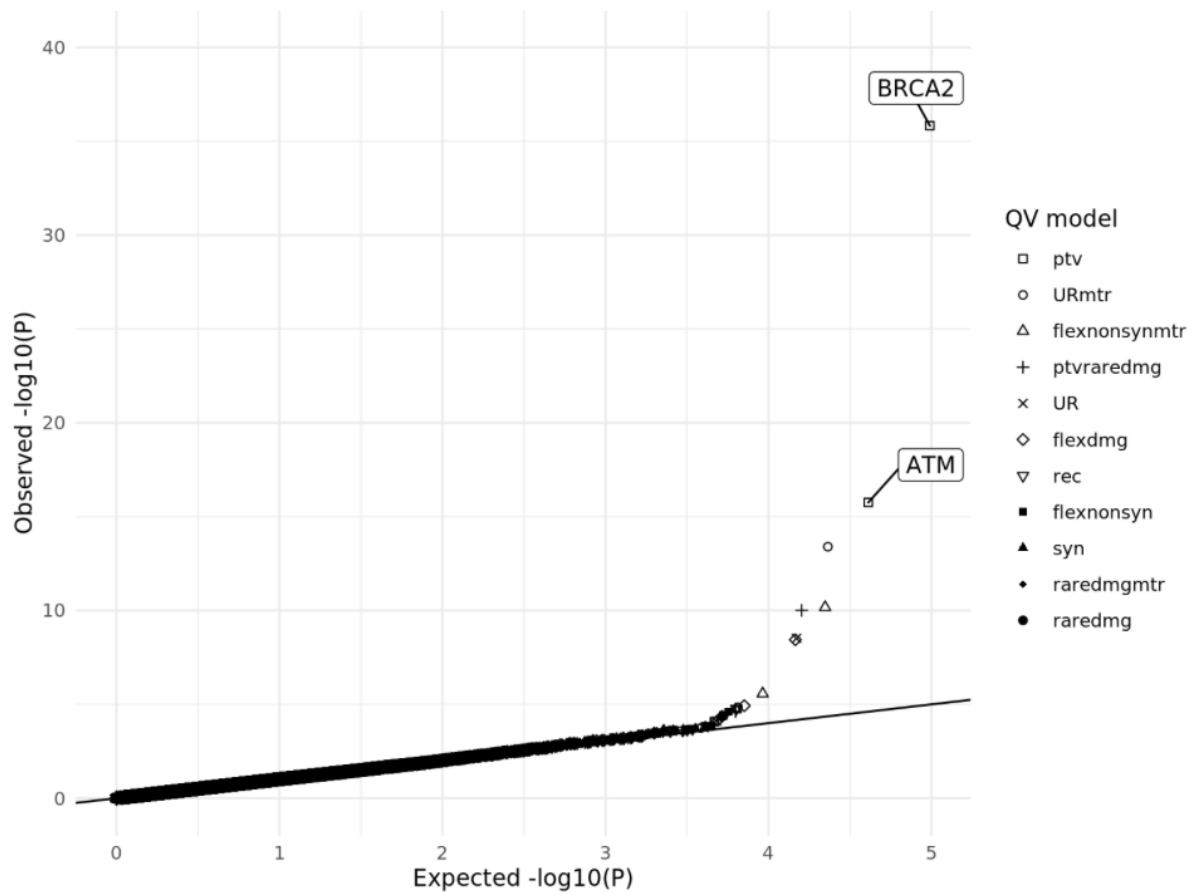

**Supplementary Figure 9: QQ-plot of all meta-analyses gene-level association tests with aggressive prostate cancer versus controls.** Expected  $P$ -values on x-axis are generated from  $n-1$  case-control permutation. Genes which reach the suggestive significance threshold ( $P < 2.6 \times 10^{-6}$ ) are labelled, and only the most significant qualifying variant (QV) model for each gene is labelled.  $P$ -values were determined from a Cochran–Mantel–Haenszel test across cohorts. All QV models defined in Supplementary Data 1.

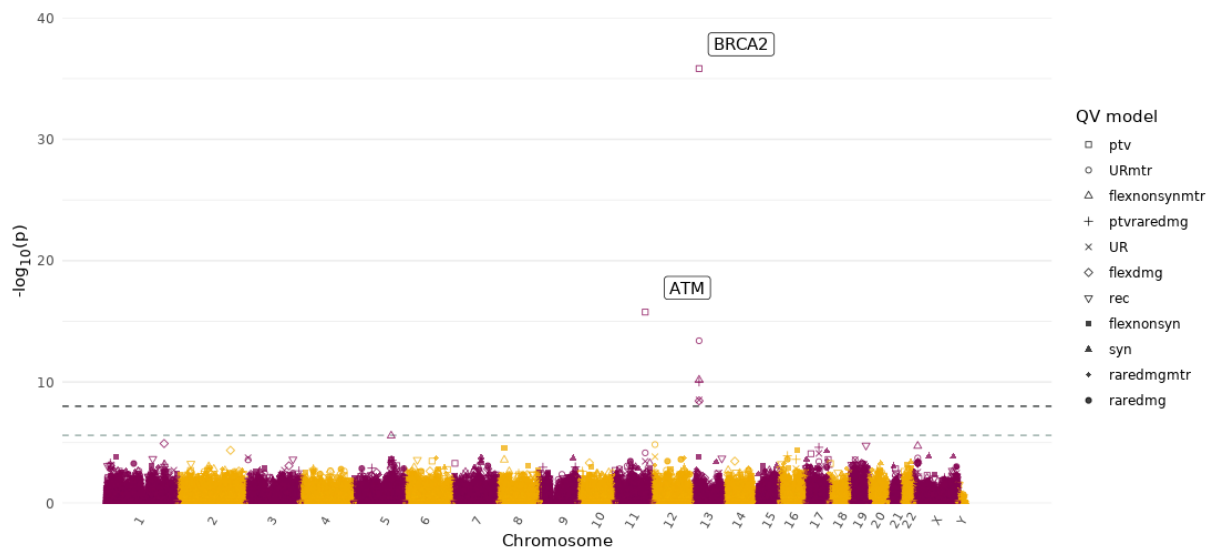

**Supplementary Figure 10: Manhattan plot of all gene-level association tests with aggressive prostate cancer versus controls.** The x-axis is the genomic position of the gene, and the y-axis is the  $-\log_{10}$  transformed unadjusted  $P$ -values for all qualifying variant models as indicated in the legend.  $P$ -values were determined from a Cochran–Mantel–Haenszel test across cohorts. The light grey dashed line represents the suggestive significance threshold ( $P = 2.6 \times 10^{-6}$ ) and the dark grey dashed line the study-wide significance threshold ( $P = 1 \times 10^{-8}$ ). Genes which reach the suggestive significance threshold are labelled, and only the most significant qualifying variant (QV) model for each gene is labelled. All QV models defined in Supplementary Data 1.

## BRCA 2 (ptv)

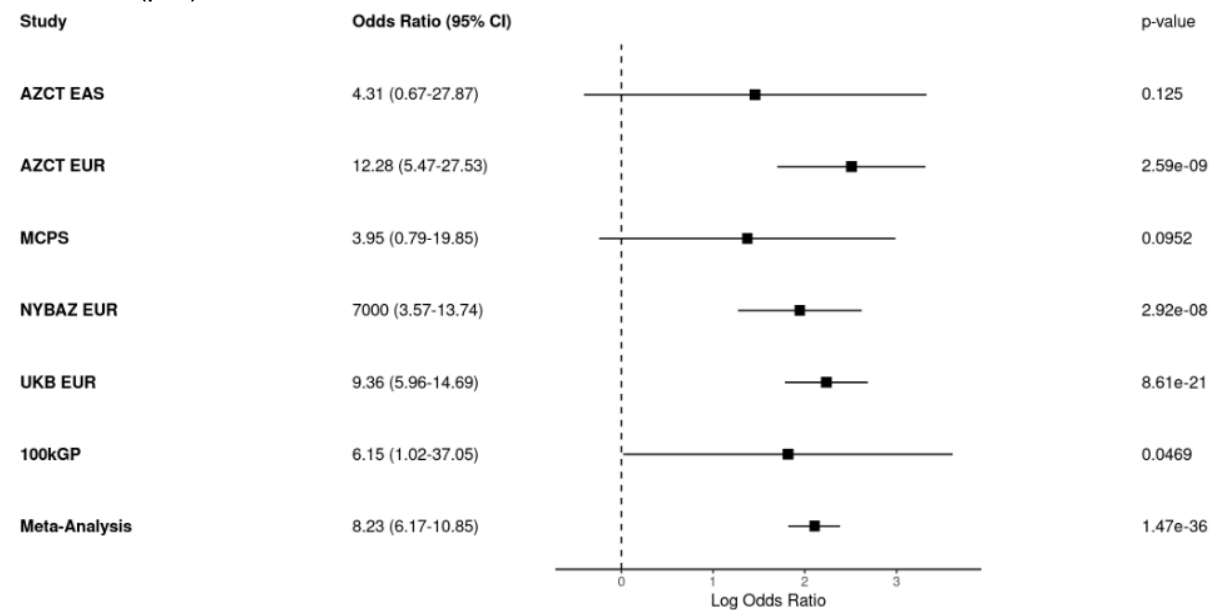

## ATM (ptv)

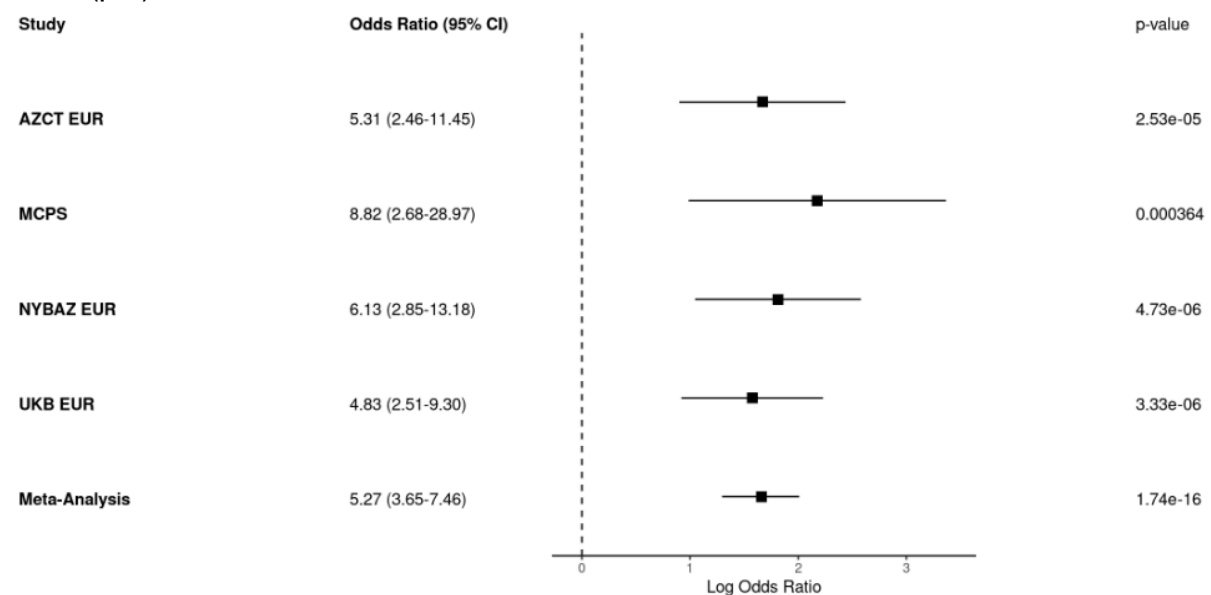

**Supplementary Figure 11: Forest plots showing the within study association statistics for all genes associated with aggressive prostate cancer versus controls at the suggestive significance threshold ( $P < 2.6 \times 10^{-6}$ ).** Results are from the gene-level collapsing analysis, and only the qualifying variant (QV) model with the lowest  $P$ -value for each gene is displayed (as indicated in parentheses). Meta-analysis odds ratios and  $P$ -values were determined from a Cochran–Mantel–Haenszel test across cohorts, and individual cohort odds ratios and  $P$ -values were calculated with Fisher's exact test (two-sided). Studies with missing data not included: full summary statistics can be found in Supplementary Data 11. All QV models defined in Supplementary Data 1.

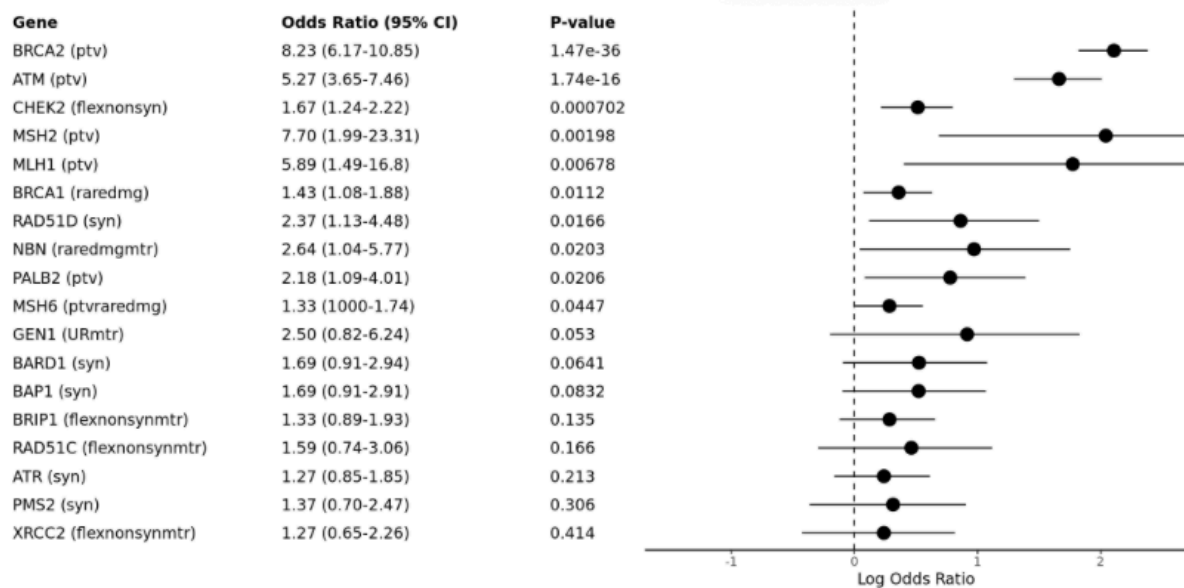

**Supplementary Figure 12: Forest plots showing the association of DNA damage response genes with aggressive prostate cancer versus controls.** Results are from the gene-level collapsing analysis, and only the qualifying variant (QV) model with the lowest *P*-value for each gene is displayed (as indicated in column one parentheses). Odds ratios and *P*-values were determined from a Cochran–Mantel–Haenszel test across cohorts. All QV models defined in Supplementary Data 1.

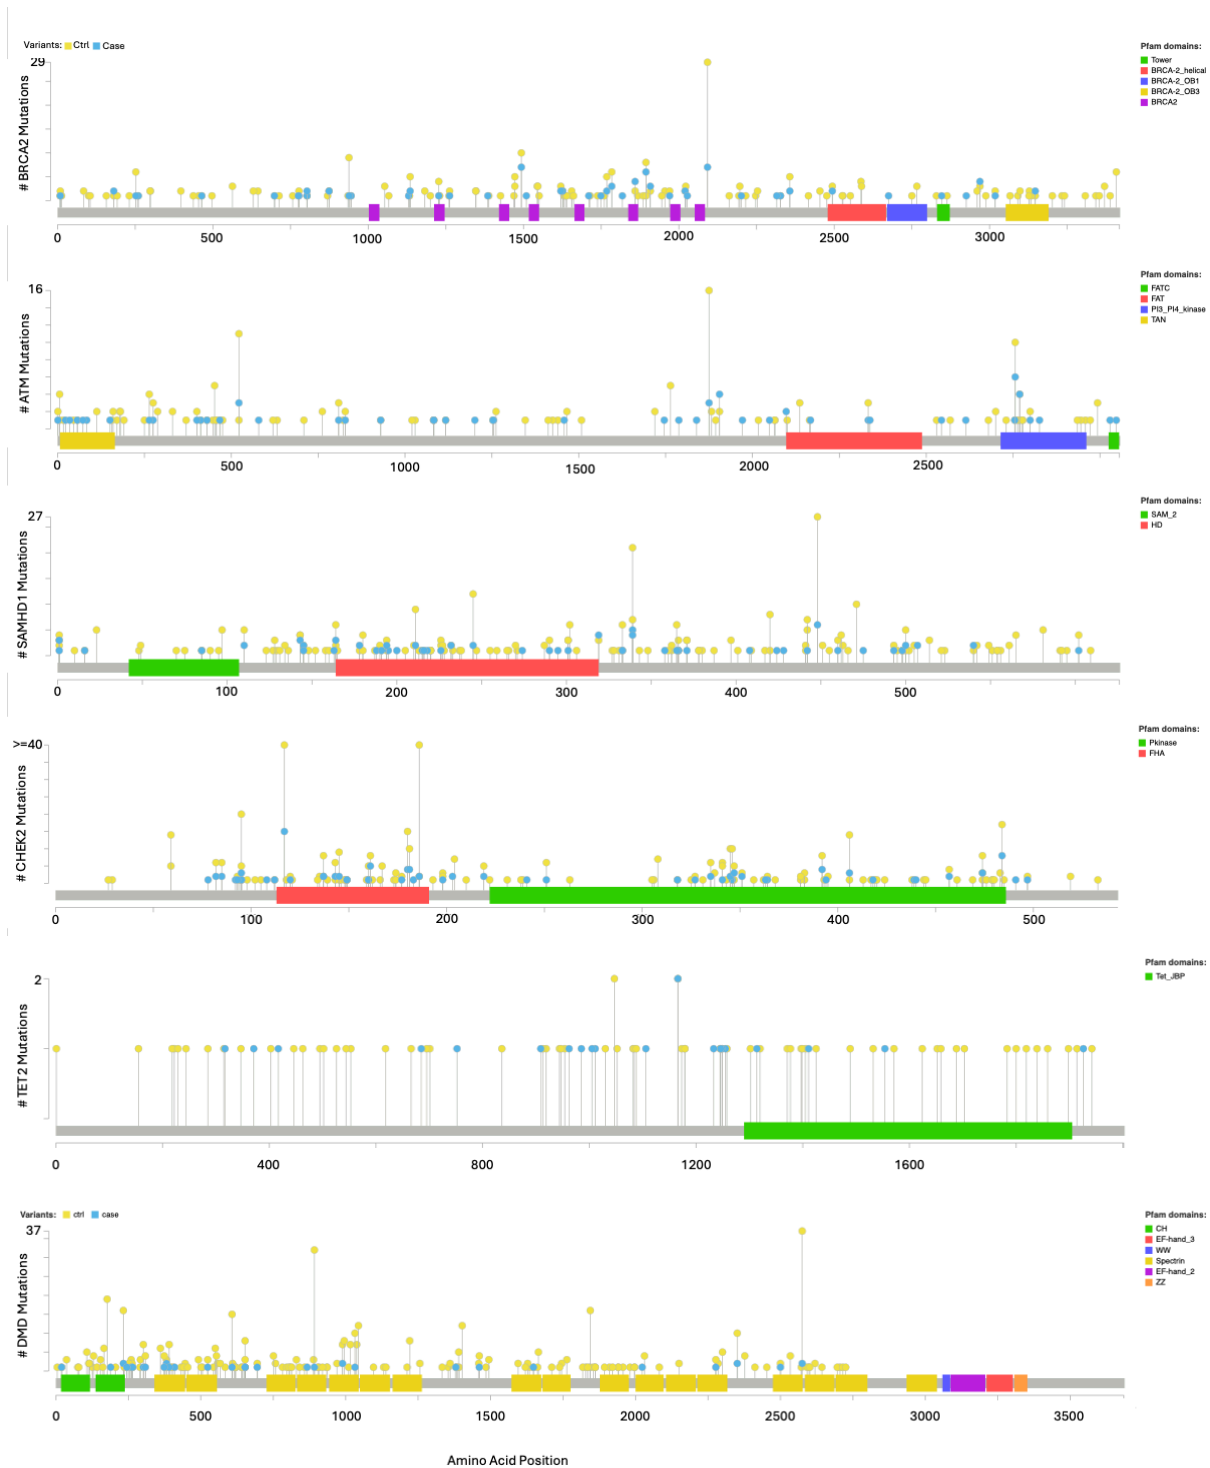

**Supplementary Figure 13: Lollipop plots showing the number of qualifying variants (y-axis) for genes significantly associated with the risk of developing prostate cancer (cases versus controls).** For each gene, only the most significantly associated qualifying variant (QV) model is shown (*BRCA2* = “ptv”; *ATM* = “ptv”; *SAMHD1* = “flexdmg”; *CHEK2* = “flexdmg”; *TET2* = “ptv”; *DMD* = “syn”). Variants are from UK Biobank European carriers. All QV models defined in Supplementary Data 1.

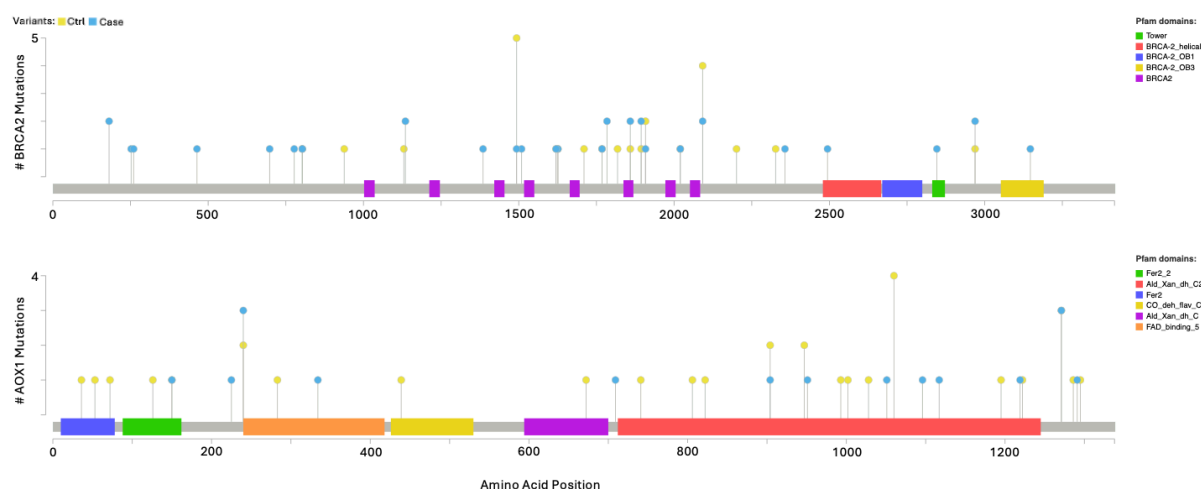

**Supplementary Figure 14: Lollipop plots showing the number of qualifying variants (y-axis) for genes significantly associated with aggressive prostate cancer versus non-aggressive prostate cancer.** For each gene, only the most significantly associated qualifying variant (QV) model is shown (*BRCA2* = “ptv”; *AOX1* = “flexdmg”). Variants are from UK Biobank European carriers. ctrl = non-aggressive prostate cancer, case = aggressive prostate cancer. All QV models defined in Supplementary Data 1.
